# Supplementary material for: A supersalt-type copper(i)-thiolate cluster with applications for mechano/thermochromism and the oxygen evolution reaction
Source: Royal Society of Chemistry journal article supplement (doi:10.1039/d0cc00619j), 2020-01-01
Supplement: d0cc00619j1.pdf [file d0cc00619j1.pdf]

*Electronic Supplementary Information (ESI) for*

## **A Supersalt-type Copper(I)-Thiolate Cluster with Applications for Mechano/Thermochromism and Oxygen Evolution Reaction**

Lanxia Hu<sup>++</sup>, Aiping Zheng<sup>++</sup>, Yao Kang,<sup>\*</sup> Tian Wen,<sup>\*</sup> and Jian Zhang

<sup>++</sup>These authors contributed equally to this work

L. Hu, A. Zheng, Prof. Y. Kang, T. Wen, and Prof. J. Zhang

State Key Laboratory of Structural Chemistry, Fujian Institute of Research on the Structure of Matter, Chinese Academy of Sciences, Fuzhou, Fujian 350002, P. R. China.

E-mail: ky@fjirsm.ac.cn

E-mail: twen@fjirsm.ac.cn

## Part I: Experimental Section

### 1. Copper(I)–thiolate cluster preparation (1)

Hexamethylenetetramine (0.100g, 0.72mmol), CuCl (0.107g,0.1mmol), dimethylsulfoxide (2.0ml), methanol(2.0ml), NH<sub>3</sub> · H<sub>2</sub>O(0.5ml) were sealed in a 20ml Teflon-lined reactor at 120°C for 10 days and then cooled to room temperature. Block crystals **1** were obtained (Yield:20%). Elemental analysis (EA) calc. (%): C, 5.30; H, 2.67; N, 6.18; S, 14.14. Found: C, 5.97; H, 2.66; N, 6.78; S, 13.64.

### 2. Single-crystal characterization

Suitable single crystals of compounds **1** was selected and glued to thin glass fibers. Crystallographic data of **1** was collected on a on a SuperNova (Cu) single crystal diffractometer equipped with graphite-monochromatic Cu K $\alpha$  radiation ( $\lambda = 1.54184 \text{ \AA}$ ) at room temperature. The structures were solved by direct methods. Crystal data as well as details of data collection and refinement for **1** was summarized in Table 1.

### 3. Basic physical measurements.

Powder X-ray diffraction (PXRD) analyses were recorded on a Rigaku Dmax2500 diffractometer with Cu K $\alpha$  radiation ( $\lambda = 1.54056 \text{ \AA}$ ) with a step size of 0.05°. Thermogravimetric analyses (TGA) were carried out at a heating rate of 10 °C/min under a nitrogen atmosphere. EA for C, H, N and S were performed on an EA1110 CHNSO CE elemental analyzer. Fourier transform infrared (FT-IR) spectra were taken on a Nicolet Magna 750 FT-IR spectrometer in the 4000–500 cm<sup>-1</sup> region by using KBr pellets. photoluminescence spectra were performed by using an Edinburgh FLS920 spectrometer equipped with a continuous Xe 900 Xenon lamp.

### 4. Electrochemical characterization

Oxygen evolution reaction measurements were performed in a standard three-electrode glass cell at ambient environment. The data were studied by a CHI760 D. The synthesized **1** was coated a substrate (e.g., Ni foam~ 0.6 cm x 0.6 cm), acting as the working electrode for electrochemical test. Also, Ag/AgCl and Carbon rod were used as counter electrode and the reference electrode, respectively. According to the Nernst equation ( $E_{\text{RHE}} = E_{\text{Ag/AgCl}} + 0.059 \times \text{pH} + 0.217$ ), the potentials tested in the work were converted to reversible hydrogen electrode (RHE). Prior to the measurements, a flow of N<sub>2</sub> was maintained over half hour into the electrolyte (1.0 MKOH). The polarization curves

were obtained with a sweep rate of 5 mVs<sup>-1</sup>. All electrochemical studies were measured without iR-correction. Electrochemical impedance spectroscopy (EIS) was carried out in a frequency range from 1 Hz to 1000 KHz.

#### **4.1 1 coated on NF electrode (1@NF)**

The as-prepared 1 was ultrasonically dispersed in the Milli-Q water(1ml) and then transferred onto the NF electrode (0.6cm x 0.6cm) with a thin layer of 0.5 wt.% Nafion solution (with a loading amount: ~ 0.33 mg cm<sup>-2</sup>), and drying in air for another 5h. Meanwhile, the same size of NF was used to control sample.

#### **4.2 RuO<sub>2</sub> coated on NF (RuO<sub>2</sub>@NF)**

The procedure for preparation of RuO<sub>2</sub>@NF was the same as that for 1@NF except for using RuO<sub>2</sub> instead of 1.

#### **4.3 1 coated on glassy carbon electrode (1@GC)**

The method for fabrication of 1@GC was the same as that for 1@NF except for using glassy carbon electrode instead of NF.

## Part II: Supplementary Results

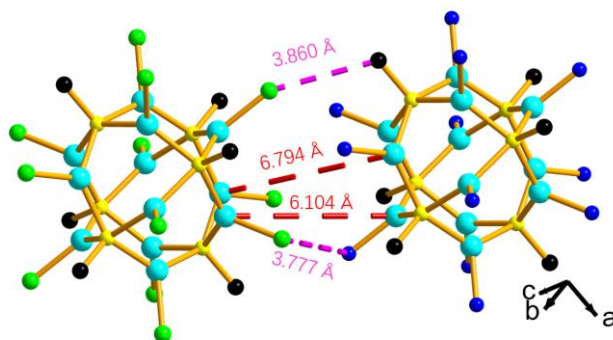

**Figure S1.** The Cu...Cu distances, C-H...Cl bond, and C-H...N bond of 1. Blue, black, yellow, green, and cyan balls represent N, C, S, Cl and Cu atoms, respectively.

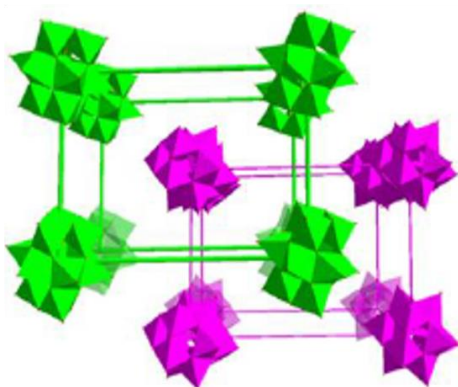

**Figure S2.** Three-dimensional penetrated diagram of 1 (cationic/ anionic clusters).

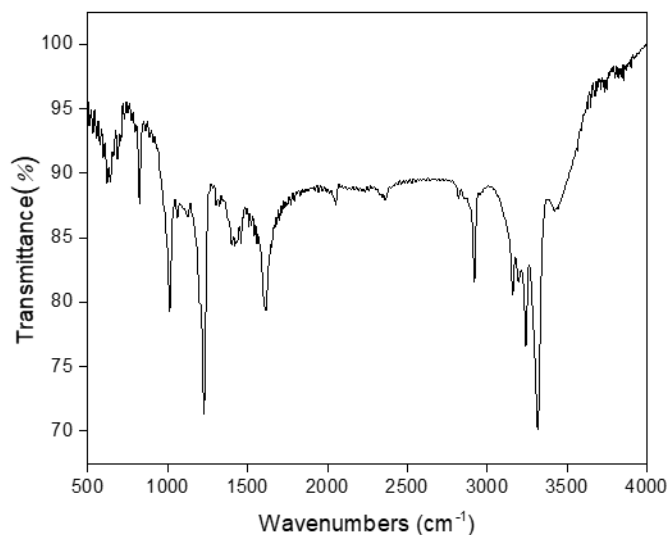

**Figure S3.** FT-IR spectroscopy of 1.

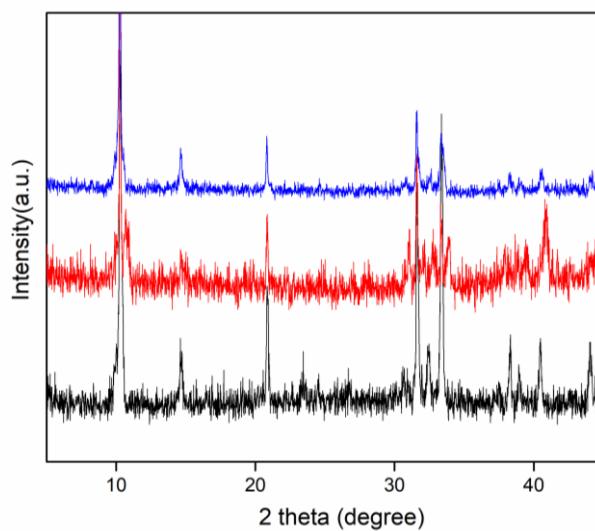

**Figure S4.** The PXRD of Cu-S Cluster under different conditions (black line: exposed in the air 3 days, red line: placed in water 12 hours, blue line: immersed 1M KOH 6 hours). These main peaks still maintained, indicating its stability.

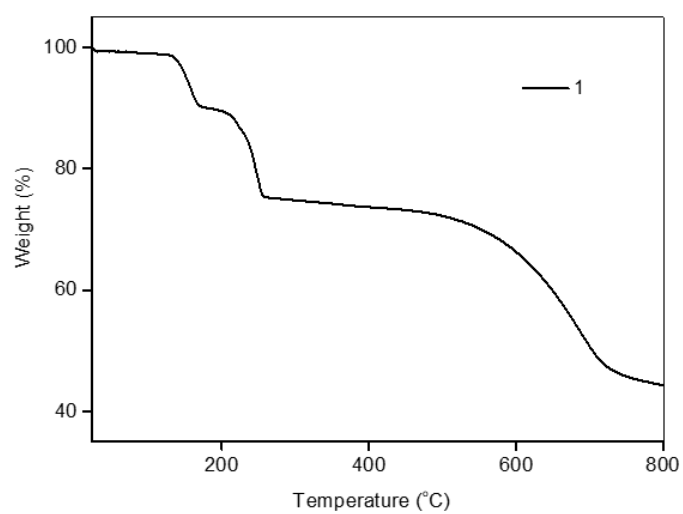

**Figure S5.** Thermogravimetry curves of 1 measured in N<sub>2</sub>.

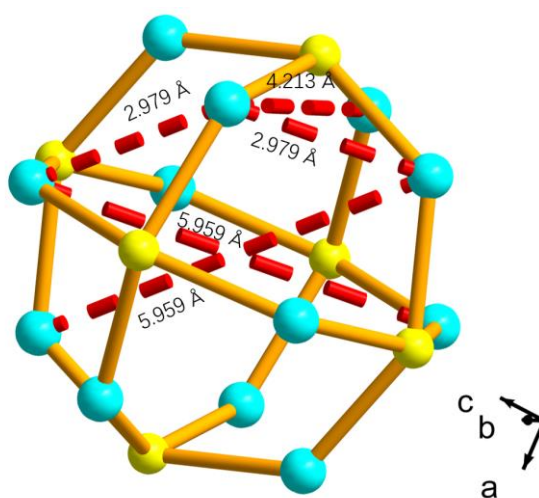

**Figure S6.** The Cu...Cu distances of isolated Cu-S cluster. Blue: Cu, yellow: S.

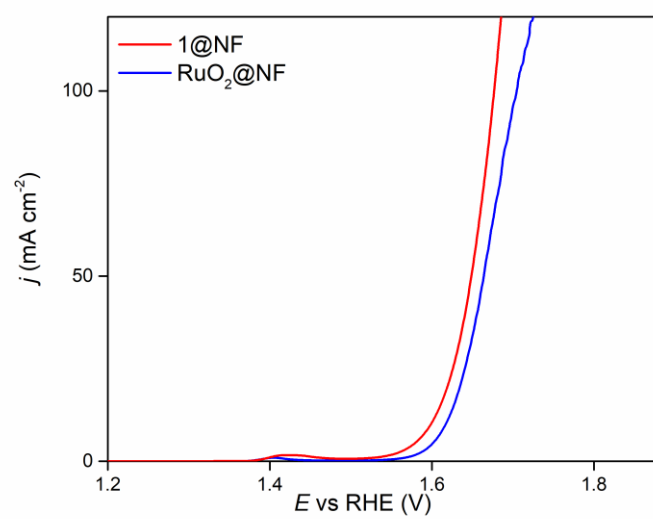

**Figure S7.** LSV curves of 1@/NF and RuO<sub>2</sub>@NF.

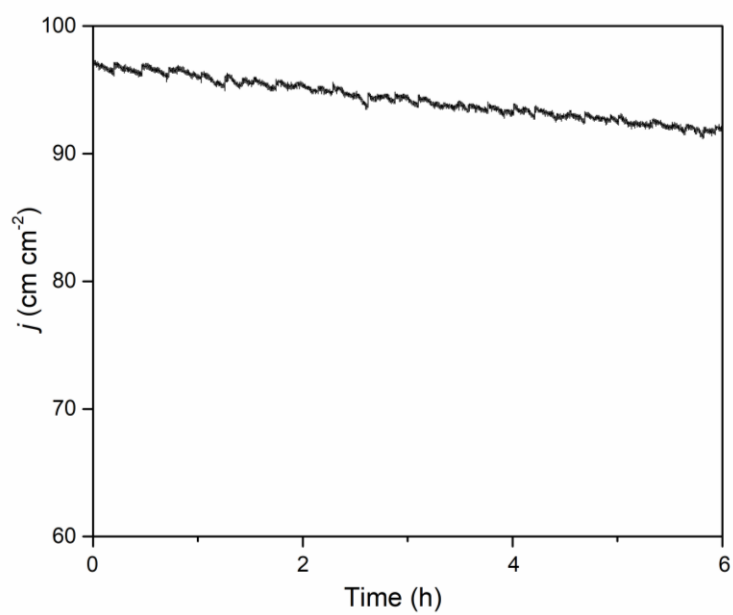

**Figure S8.** Time-dependent current density curve for 1 under a constant potential of 1.5 V in 1 M KOH aqueous solution.

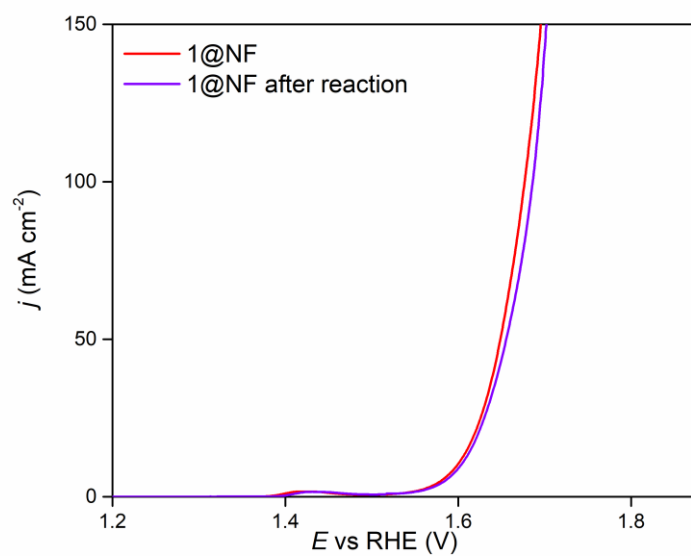

**Figure S9.** LSV curves of 1@/NF after reaction.

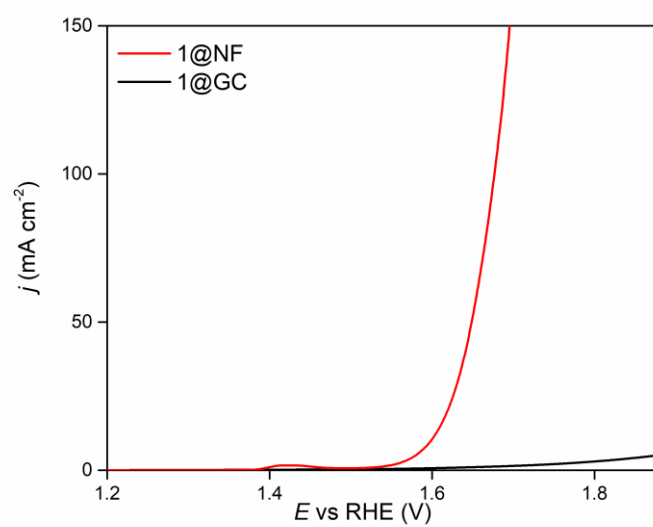

**Figure S10.** LSV curves of 1 coated on glass carbon substrates and Ni foam.



**Table S1.** Summary of Crystallographic Data of 1

|                                                             |                                                                                                              |
|-------------------------------------------------------------|--------------------------------------------------------------------------------------------------------------|
| Name                                                        | 1                                                                                                            |
| chemical formula                                            | C <sub>6</sub> H <sub>36</sub> Cl <sub>6</sub> Cu <sub>12</sub> N <sub>6</sub> S <sub>6</sub> S <sub>6</sub> |
| formula mass                                                | 1359.95                                                                                                      |
| Space group                                                 | <i>Pm-3m</i>                                                                                                 |
| a/Å                                                         | 12.3881(2)                                                                                                   |
| b/Å                                                         | 14.0236(8)                                                                                                   |
| c/Å                                                         | 12.3881(2)                                                                                                   |
| α/°                                                         | 90.00                                                                                                        |
| β/°                                                         | 90.00                                                                                                        |
| γ/°                                                         | 90.00                                                                                                        |
| Volume/Å <sup>3</sup>                                       | 1901.14(9)                                                                                                   |
| Z, calculated density(g/cm <sup>3</sup> )                   | 2, 2.376                                                                                                     |
| absorption coefficient (mm <sup>-1</sup> )                  | 7.325                                                                                                        |
| F(000)                                                      | 1320.0                                                                                                       |
| R <sub>int</sub>                                            | 0.0266                                                                                                       |
| GOF on F <sub>2</sub>                                       | 1.088                                                                                                        |
| R <sub>1</sub> , <sup>a</sup> wR <sub>2</sub> [ I  > 2σ(I)] | 0.0738, 0.2678                                                                                               |
| R <sub>1</sub> , wR <sub>2</sub> (all data)                 | 0.0759, 0.2711                                                                                               |
| CCDC Number                                                 | 1977641                                                                                                      |

$${}^aR_1 = \Sigma(|F_o| - |F_c|)/\Sigma|F_o|, wR_2 = [\Sigma w(F_o^2 - F_c^2)^2/\Sigma w(F_o^2)^2]^{0.5}$$
